# Supplementary material
Source: publisher figshare collection journal article supplement (https://tandf.figshare.com/ndownloader/files/12936923)
Supplement: Supplementary file 1 [file 12936923]

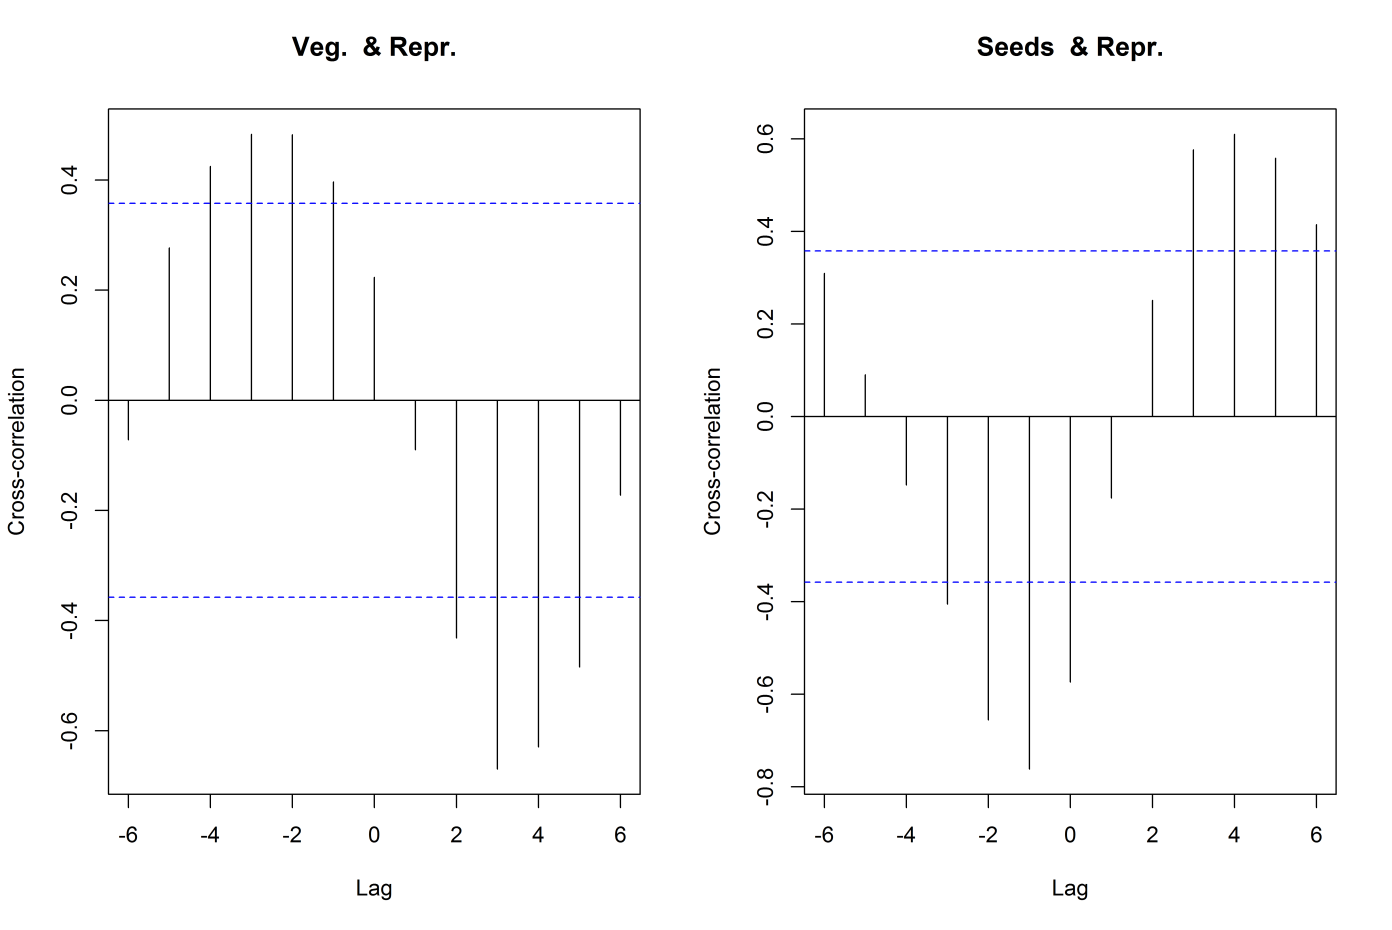


Figure 1: Cross correlation functions between the proportions of reproductively active animals and stomach content of *M.* *natalensis* at different time lags*.* Left: correlations between percentage vegetative material and reproductive activity. Right: correlations between percentage of seeds/grains and reproductive activity. The blue dotted lines represent the cut-off for correlations significant at that time-lag (months).
